# Supplementary material for: Computational investigation of geometrical effects in 2D boron nitride nanopores for DNA detection
Source: Royal Society of Chemistry journal article supplement (doi:10.1039/c9nr10172a), 2020-01-01
Supplement: c9nr10172a1.pdf [file c9nr10172a1.pdf]

1 Supporting Information of  
2 Computational Investigation of Geometrical Effect in 2D Boron  
3 Nitride Nanopores for DNA Detection

4 Yonghui Zhang,<sup>a,b</sup> Yujia Zhou,<sup>c</sup> Zhen Li<sup>d</sup>, Huoji Chen,<sup>e</sup> Li Zhang<sup>\*a,f</sup> & Jun Fan<sup>\*b,g</sup>

5 *<sup>a</sup>School of Materials and Energy, Guangdong University of Technology, Guangzhou,*  
6 *China*

7 *<sup>b</sup>Department of Materials Science and Engineering, City University of Hong Kong, 83*  
8 *Tat Chee Avenue, Hong Kong, China.*

9 *<sup>c</sup>School of Biomedical Engineering, Southern Medical University, Guangzhou, China*

10 *<sup>d</sup>School of Materials Science and Engineering, China University of Petroleum (East*  
11 *China), Qingdao, 266580, China*

12 *<sup>e</sup>School of Traditional Chinese Medicine, Southern Medical University, Guangzhou,*  
13 *China*

14 *<sup>f</sup>Guangdong University of Finance and Economics, Guangzhou, China*

15 *<sup>g</sup>Center for Advanced Nuclear Safety and Sustainable Development, City University of*  
16 *Hong Kong, 83 Tat Chee Avenue, Hong Kong, China*

17

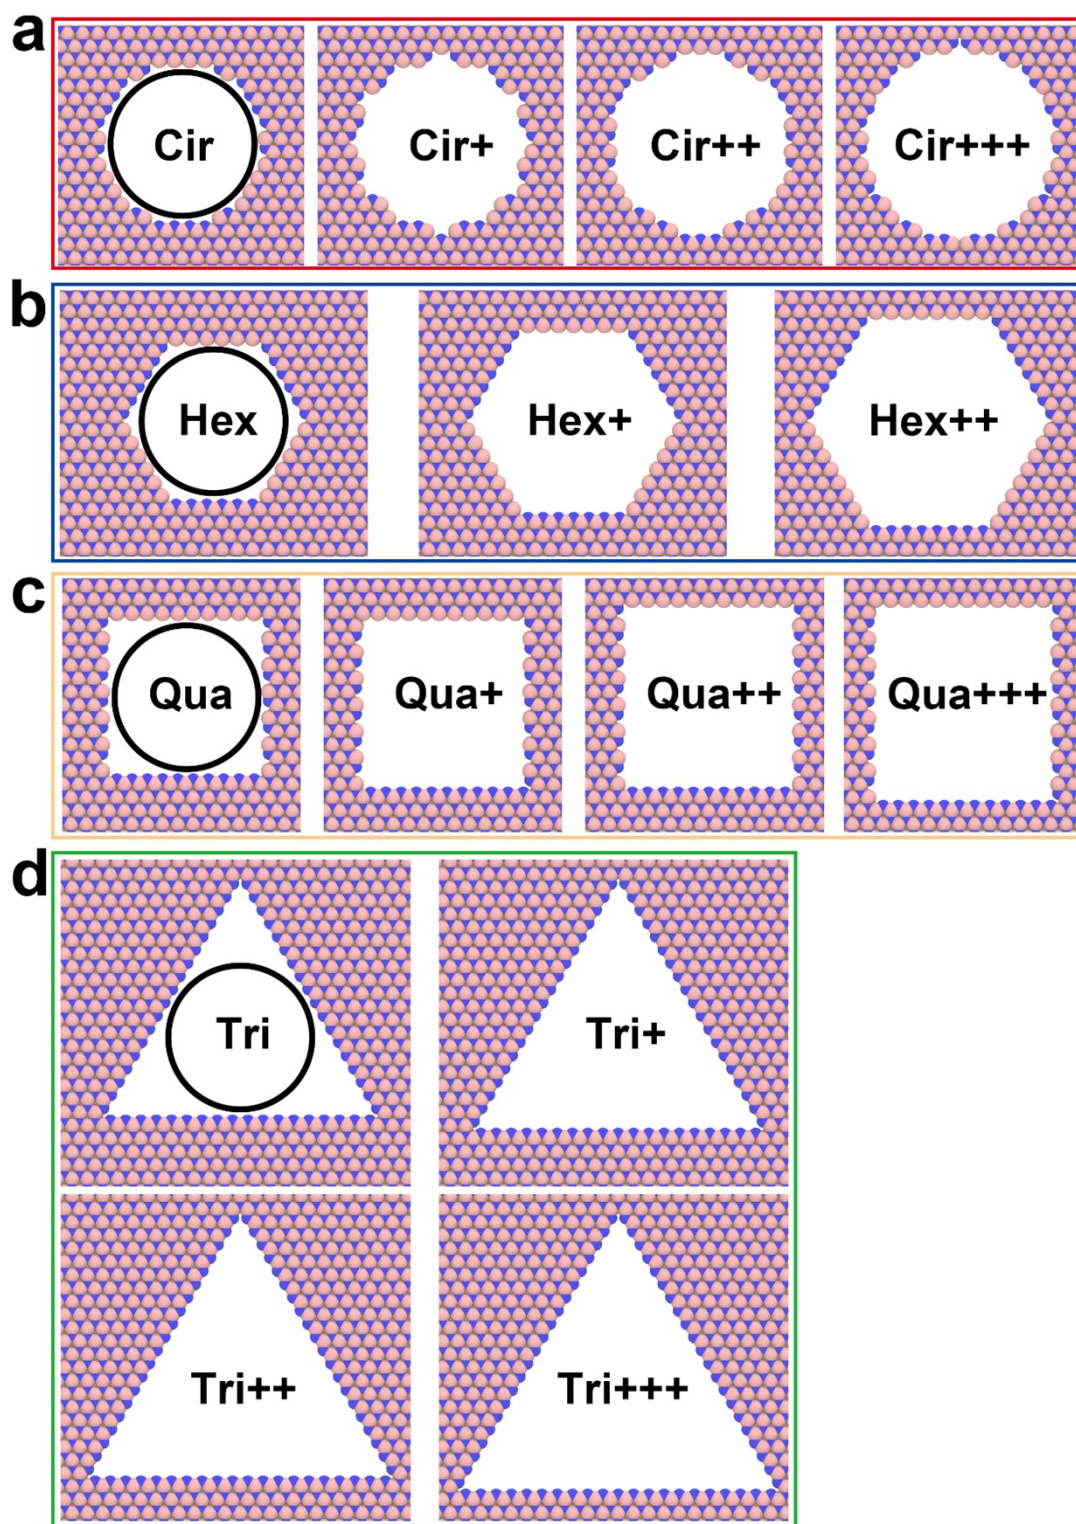

1

2 **Figure S1. Atomic models of BN nanopore.** Atomic models of BN nanopore with circular (a),  
 3 hexagonal (b), quadrangular (c) and triangular (d) shapes investigated in this study. The solid  
 4 circles in the Cir, Hex, Qua and Tri systems indicate the minimum inscribed circles with same  
 5 2.46 nm effective diameter, which is defined as the distance between the pore atoms at the diameter  
 6 minus the van der Waals radius of boron and nitrogen ( $\sim 0.3$  nm). More geometrical information  
 7 of the nanopore is list in table S1.

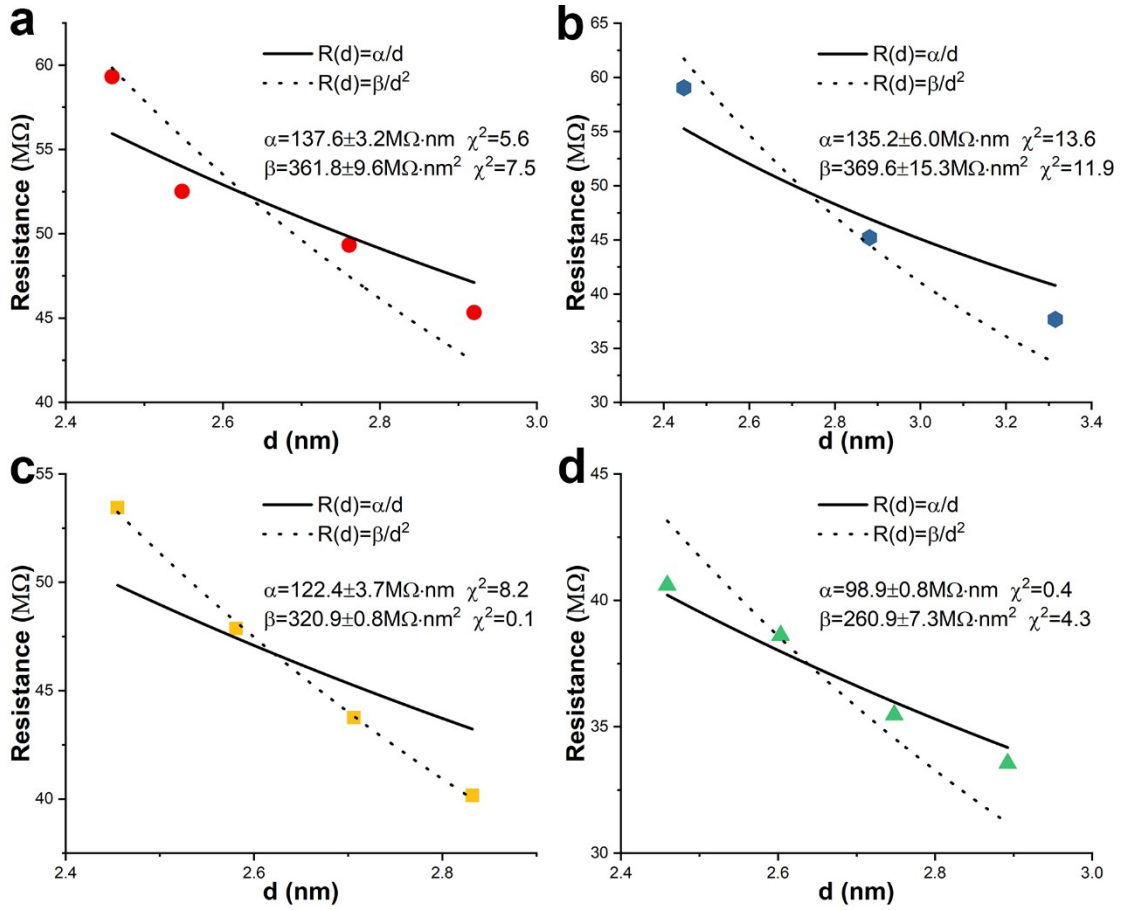

1

2 **Figure S2. Ionic resistance for circular (a), hexagonal (b), quadrangular (c) and triangular**  
 3 **(d) shape nanopores of various size, fitted according to two functional dependences**  
 4  **$R(d)=\alpha/d$  and  $R(d)=\beta/d^2$ . The effective diameter ( $d$ ) of the minimum inscribed circle is used for**  
 5 **the hexagonal, quadrangular and triangular shape nanopores.**

6

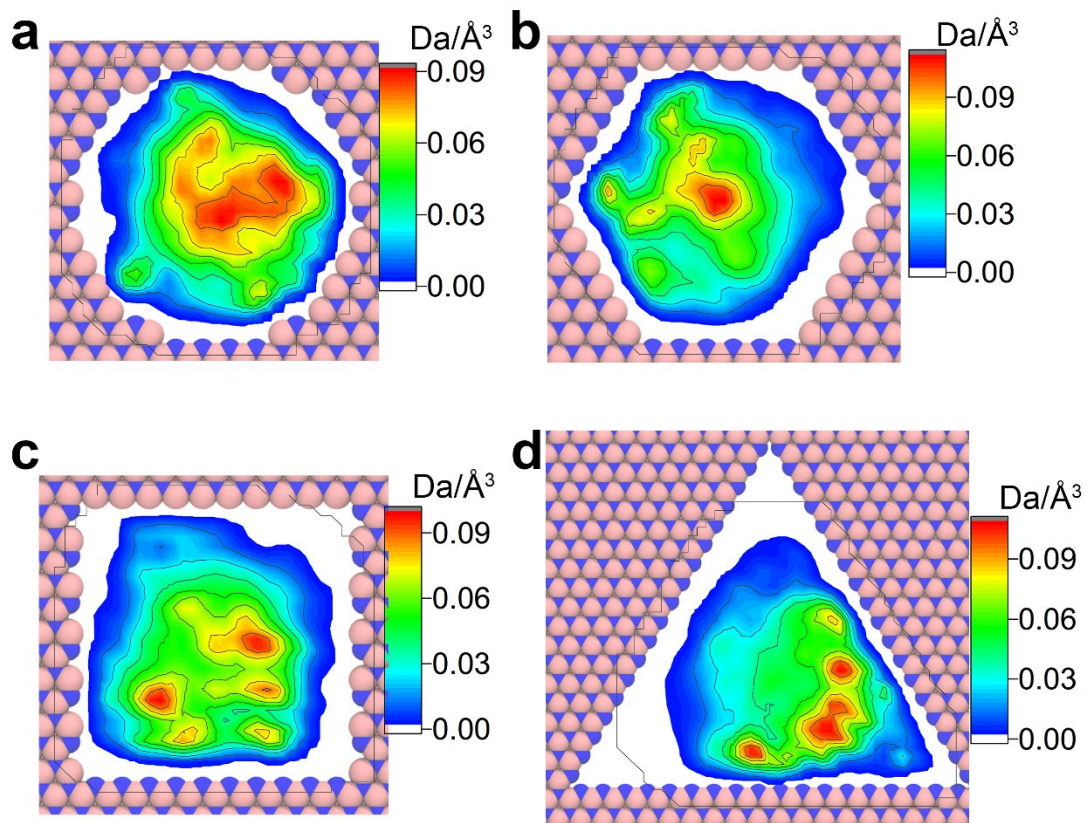

1

2

3 **Figure S3. Mass density of DNA for the Cir (a), Hex (b), Qua (c) and Tri (d) systems.**

4 Heavy atoms of DNA molecule within 6 Å of the BN membrane are counted.

5

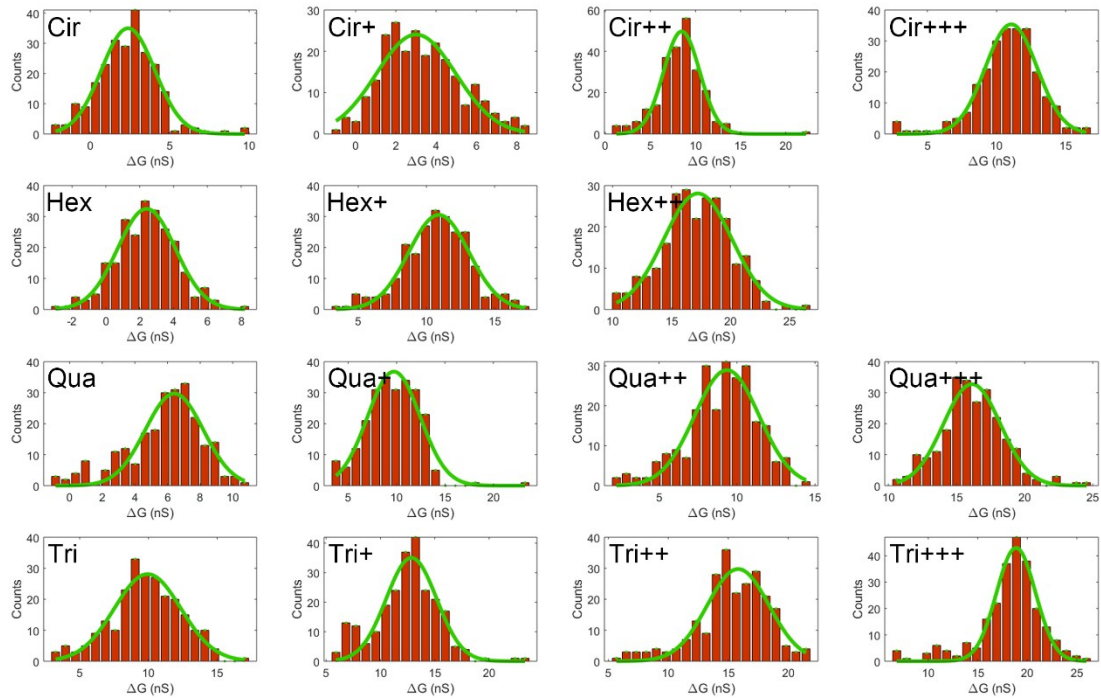

1

2 **Figure S4. Histograms of conductance blockades for all the systems with dsDNA**  
 3 **translocating through the nanopores. Gaussian fit (Green solid line) was performed to obtain**  
 4 **the expectation of every distribution.**

5

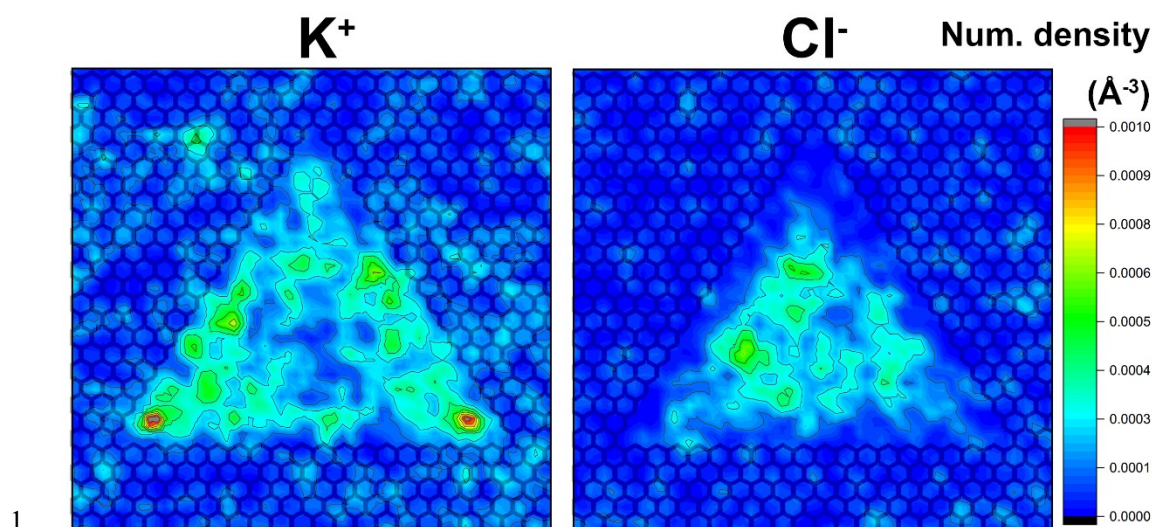

1

**Table S1. Geometrical information of BN nanopores**

| <i>Nanopore geometry</i> | Diameter d (nm) | Area A (nm <sup>2</sup> ) |
|--------------------------|-----------------|---------------------------|
| <i>Cir</i>               | 2.46            | 4.75                      |
| <i>Cir+</i>              | 2.55            | 5.10                      |
| <i>Cir++</i>             | 2.76            | 5.99                      |
| <i>Cir+++</i>            | 2.92            | 6.70                      |
| <i>Hex</i>               | 2.46*           | 5.19                      |
| <i>Hex+</i>              | 2.88*           | 7.19                      |
| <i>Hex++</i>             | 3.32*           | 9.52                      |
| <i>Qua</i>               | 2.46*           | 6.36                      |
| <i>Qua+</i>              | 2.58*           | 7.06                      |
| <i>Qua++</i>             | 2.71*           | 7.80                      |
| <i>Qua+++</i>            | 2.83*           | 8.98                      |
| <i>Tri</i>               | 2.46*           | 7.85                      |
| <i>Tri+</i>              | 2.60*           | 8.80                      |
| <i>Tri++</i>             | 2.75*           | 9.81                      |
| <i>Tri+++</i>            | 2.89*           | 10.87                     |

2 \* List is the effective diameter of the minimum inscribed circle.

3

**Table S2. Information of systems simulated**

| <i>Nanopore geometry</i> | <i>DNA (bp)</i>     | <i>No. of atoms</i> | <i>Simulation duration (ns)</i> |
|--------------------------|---------------------|---------------------|---------------------------------|
| <i>Cir</i>               | n/a                 | 193815              | 27                              |
| <i>Cir</i>               | [A-T] <sup>45</sup> | 208847              | 60*                             |
| <i>Cir</i>               | [C-G] <sup>45</sup> | 208994              | 75*                             |
| <i>Cir+</i>              | n/a                 | 205491              | 27                              |
| <i>Cir+</i>              | [A-T] <sup>45</sup> | 204680              | 90*                             |
| <i>Cir+</i>              | [C-G] <sup>45</sup> | 204992              | 65*                             |
| <i>Cir++</i>             | n/a                 | 205482              | 27                              |
| <i>Cir++</i>             | [A-T] <sup>45</sup> | 204635              | 70*                             |
| <i>Cir++</i>             | [C-G] <sup>45</sup> | 204935              | 60*                             |
| <i>Cir+++</i>            | n/a                 | 205482              | 27                              |
| <i>Cir+++</i>            | [A-T] <sup>45</sup> | 204647              | 70*                             |
| <i>Cir+++</i>            | [C-G] <sup>45</sup> | 204761              | 65*                             |
| <i>Hex</i>               | n/a                 | 193809              | 27                              |
| <i>Hex</i>               | [A-T] <sup>45</sup> | 208787              | 70*                             |
| <i>Hex</i>               | [C-G] <sup>45</sup> | 209012              | 70*                             |
| <i>Hex+</i>              | n/a                 | 205473              | 27                              |
| <i>Hex+</i>              | [A-T] <sup>45</sup> | 204677              | 70*                             |
| <i>Hex+</i>              | [C-G] <sup>45</sup> | 208790              | 75*                             |
| <i>Hex++</i>             | n/a                 | 205479              | 27                              |
| <i>Hex++</i>             | [A-T] <sup>45</sup> | 208787              | 60*                             |
| <i>Hex++</i>             | [C-G] <sup>45</sup> | 208796              | 70*                             |
| <i>Qua</i>               | n/a                 | 193815              | 27                              |
| <i>Qua</i>               | [A-T] <sup>45</sup> | 208718              | 75*                             |
| <i>Qua</i>               | [C-G] <sup>45</sup> | 208904              | 65*                             |
| <i>Qua+</i>              | n/a                 | 209501              | 27                              |
| <i>Qua+</i>              | [A-T] <sup>45</sup> | 208663              | 75*                             |
| <i>Qua+</i>              | [C-G] <sup>45</sup> | 208828              | 75*                             |



|               |                     |        |     |
|---------------|---------------------|--------|-----|
| <i>Qua++</i>  | n/a                 | 209510 | 27  |
| <i>Qua++</i>  | [A-T] <sup>45</sup> | 208732 | 60* |
| <i>Qua++</i>  | [C-G] <sup>45</sup> | 208744 | 60* |
| <i>Qua+++</i> | n/a                 | 209508 | 27  |
| <i>Qua+++</i> | [A-T] <sup>45</sup> | 208721 | 60* |
| <i>Qua+++</i> | [C-G] <sup>45</sup> | 208739 | 75* |
| <i>Tri</i>    | n/a                 | 205488 | 27  |
| <i>Tri</i>    | [A-T] <sup>45</sup> | 208718 | 90* |
| <i>Tri</i>    | [C-G] <sup>45</sup> | 208748 | 60* |
| <i>Tri+</i>   | n/a                 | 205499 | 27  |
| <i>Tri+</i>   | [A-T] <sup>45</sup> | 208777 | 65* |
| <i>Tri+</i>   | [C-G] <sup>45</sup> | 208795 | 70* |
| <i>Tri++</i>  | n/a                 | 205472 | 27  |
| <i>Tri++</i>  | [A-T] <sup>45</sup> | 208834 | 80* |
| <i>Tri++</i>  | [C-G] <sup>45</sup> | 208816 | 75* |
| <i>Tri+++</i> | n/a                 | 205500 | 27  |
| <i>Tri+++</i> | [A-T] <sup>45</sup> | 208871 | 80* |
| <i>Tri+++</i> | [C-G] <sup>45</sup> | 208757 | 60* |

1 \*Simulations with three replicas (refer to simulation S1, S2 and S3).

2
